# Supplementary material for: Replica exchange molecular dynamics study of the amyloid beta (11–40) trimer penetrating a membrane
Source: Royal Society of Chemistry journal article supplement (doi:10.1039/c6ra26461a), 2017-01-01
Supplement: c6ra26461a1.pdf [file c6ra26461a1.pdf]

## Supplementary Information

### Replica Exchange Molecular Dynamics Study of the Amyloid beta (11-40) Trimer Penetrating the Membrane

Son Tung Ngo,<sup>ab</sup> Huynh Minh Hung,<sup>c</sup> Khoa Nhat Tran,<sup>d</sup> and Minh Tho Nguyen<sup>c</sup>

<sup>a</sup>Computational Chemistry Research Group, Ton Duc Thang University, Ho Chi Minh City, Vietnam

<sup>b</sup>Faculty of Applied Sciences, Ton Duc Thang University, Ho Chi Minh City, Vietnam

<sup>c</sup>Department of Chemistry, KU Leuven, Celestijnenlaan 200F, B-3001 Leuven, Belgium

<sup>d</sup>Department of Biological Sciences; University of Maryland Baltimore County; 21250 Baltimore, Maryland USA

\*Emails: [ngosontung@tdt.edu.vn](mailto:ngosontung@tdt.edu.vn); [minh.nguyen@kuleuven.be](mailto:minh.nguyen@kuleuven.be)

The Electronic Supporting Information file includes the temperature index of the REMD simulations. Additional figures consist of the mean exchange rates between neighboring replicas, the distribution of potential energy of all replicas, the diffusion of temperature space of 1<sup>st</sup> and 48<sup>th</sup> replicas, the RMSF of the trimer, and the RMSD of the solvate A $\beta_{11-40}$  trimer.

The structure changed of transmembrane 3A $\beta_{11-40}$  peptide in explicit solvent inserting the membrane DPPC lipid bilayers has been investigated using replica exchange molecular dynamics simulations that the number of replicas is 48 as range from 290 to 417 K, such as 290.00, 292.34, 294.69, 297.06, 299.44, 301.83, 304.24, 306.67, 309.11, 311.56, 314.04, 316.52, 319.03, 321.54, 324.08, 326.63, 329.19, 331.77, 334.37, 336.99, 339.62, 342.26, 344.92, 347.6, 350.3, 353.01, 355.75, 358.49, 361.27, 364.05, 366.85, 369.67, 372.51, 375.37, 378.24, 381.14, 384.04, 386.97, 389.92, 392.88, 395.86, 398.87, 401.89, 404.93, 407.99, 411.07, 414.16, 417.28 K.

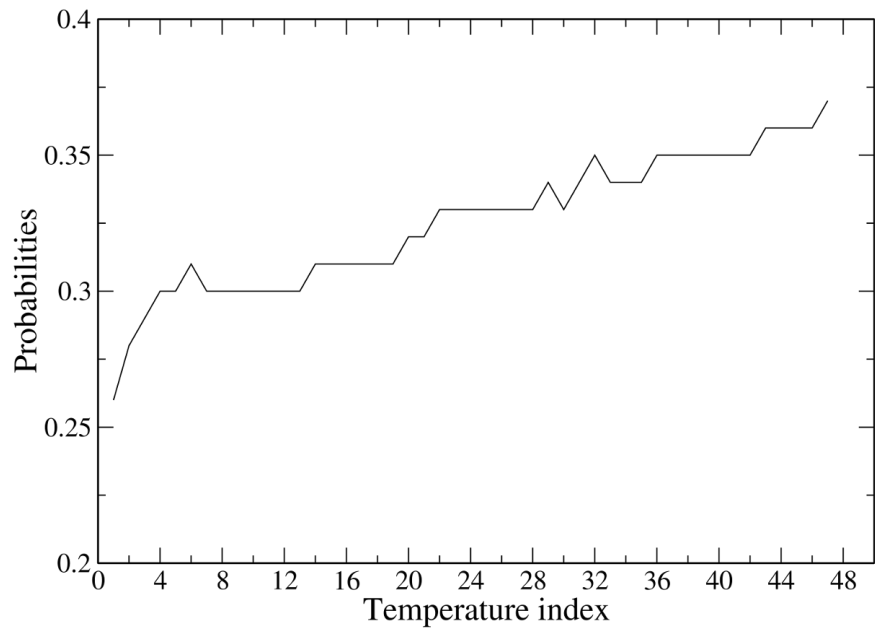

**Fig. S1** The average of exchange rate between neighbor replicas that are almost higher than 26%.

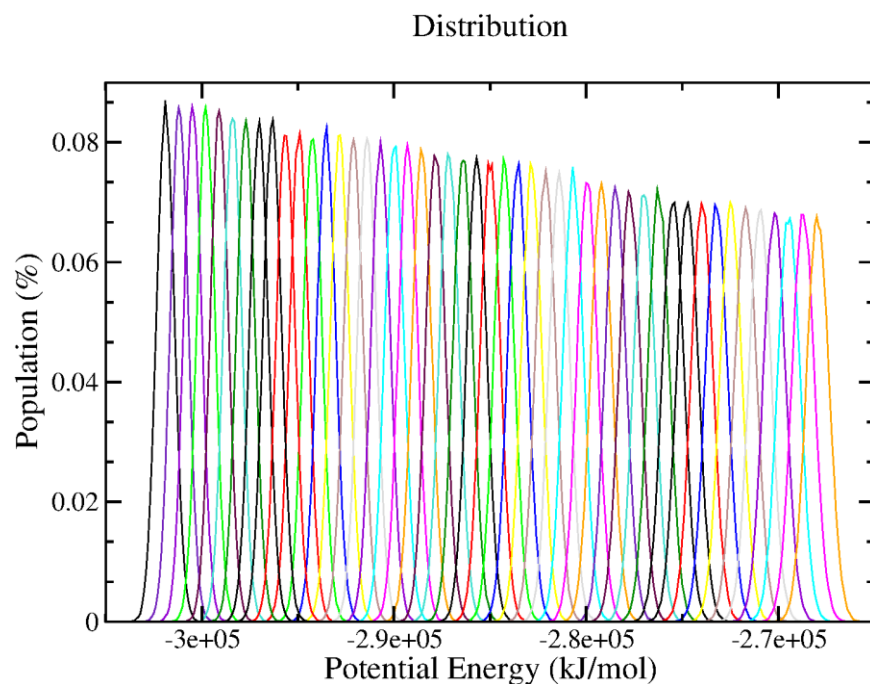

**Fig. S2** The distribution of potential energy of 48 replicas of transmembrane truncated  $3A\beta_{11-40}$  oligomer with bilayer DPPC lipid bilayers at 324 K. The energetic overlap between neighboring replicas is good which keep effective exchange according the Metropolis Criterion.

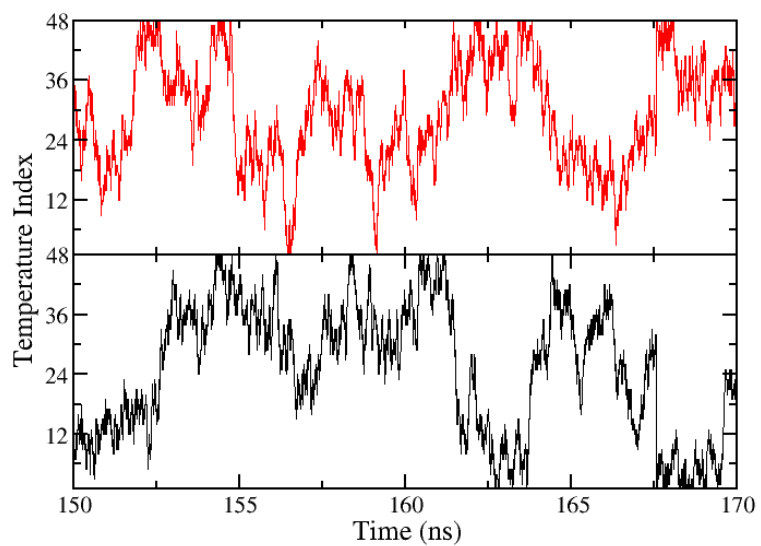

**Fig. S3** The diffusion of temperature space of the REMD simulations is monitored by the replica temperature index that is exchanged between the 1<sup>st</sup> (black) and 48<sup>th</sup> (red) replicas.

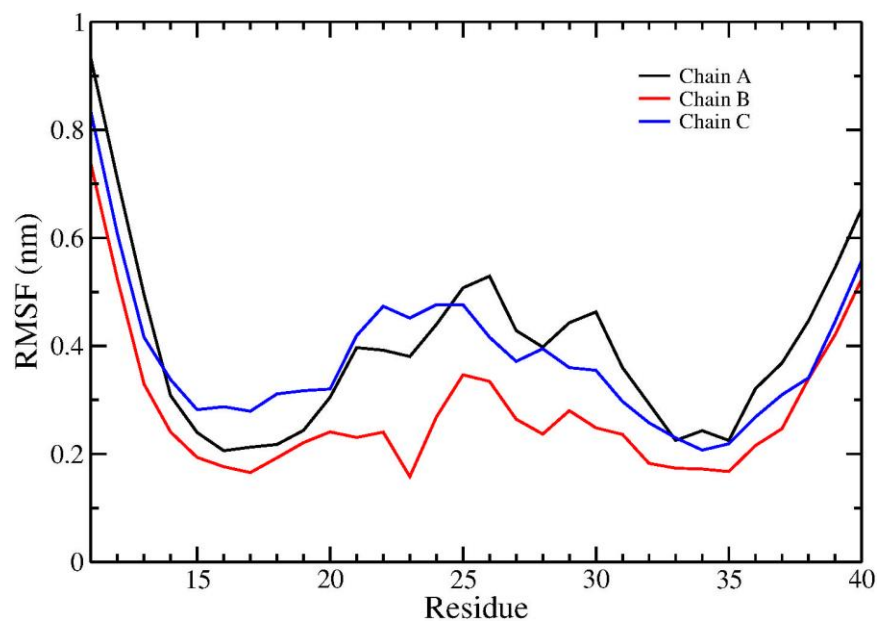

**Fig. S4** The root mean square fluctuation of transmembrane 3A $\beta_{11-40}$  peptide at 324 K during last 300 ns REMD simulations.

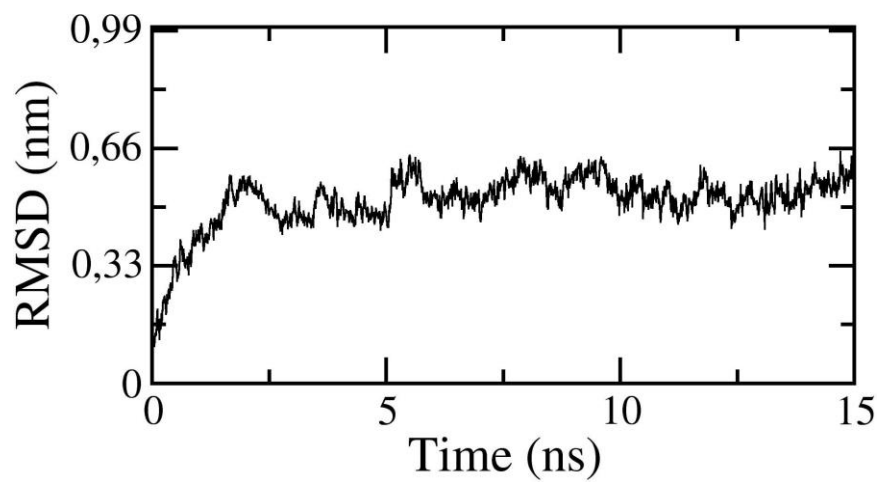

**Fig. S5** The RMSD of the solvated A $\beta_{11-40}$  trimer in solution. The system get the equilibrium after 2.0 ns approximately.

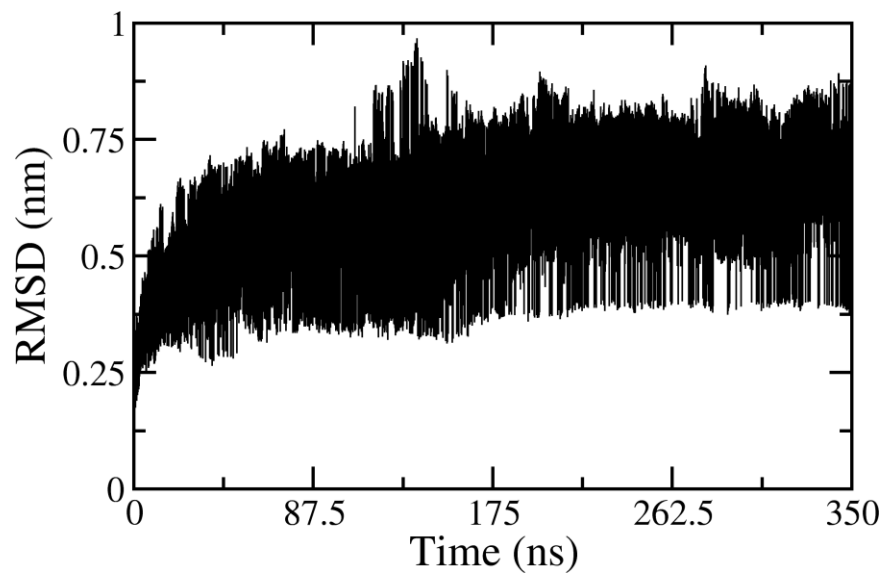

**Fig. S6** The RMSD of the A $\beta_{11-40}$  trimer in the solution of the continuous trajectory of the 4<sup>th</sup> replica while diffusing in the temperature space.
